# Supplementary material
Source: PubMed Central journal article supplement (PMC3517235)
Supplement: supp_tpc.112.103689_tpc103689Supplementalrevised.pdf [file supp_tpc.112.103689_tpc103689Supplementalrevised.pdf]

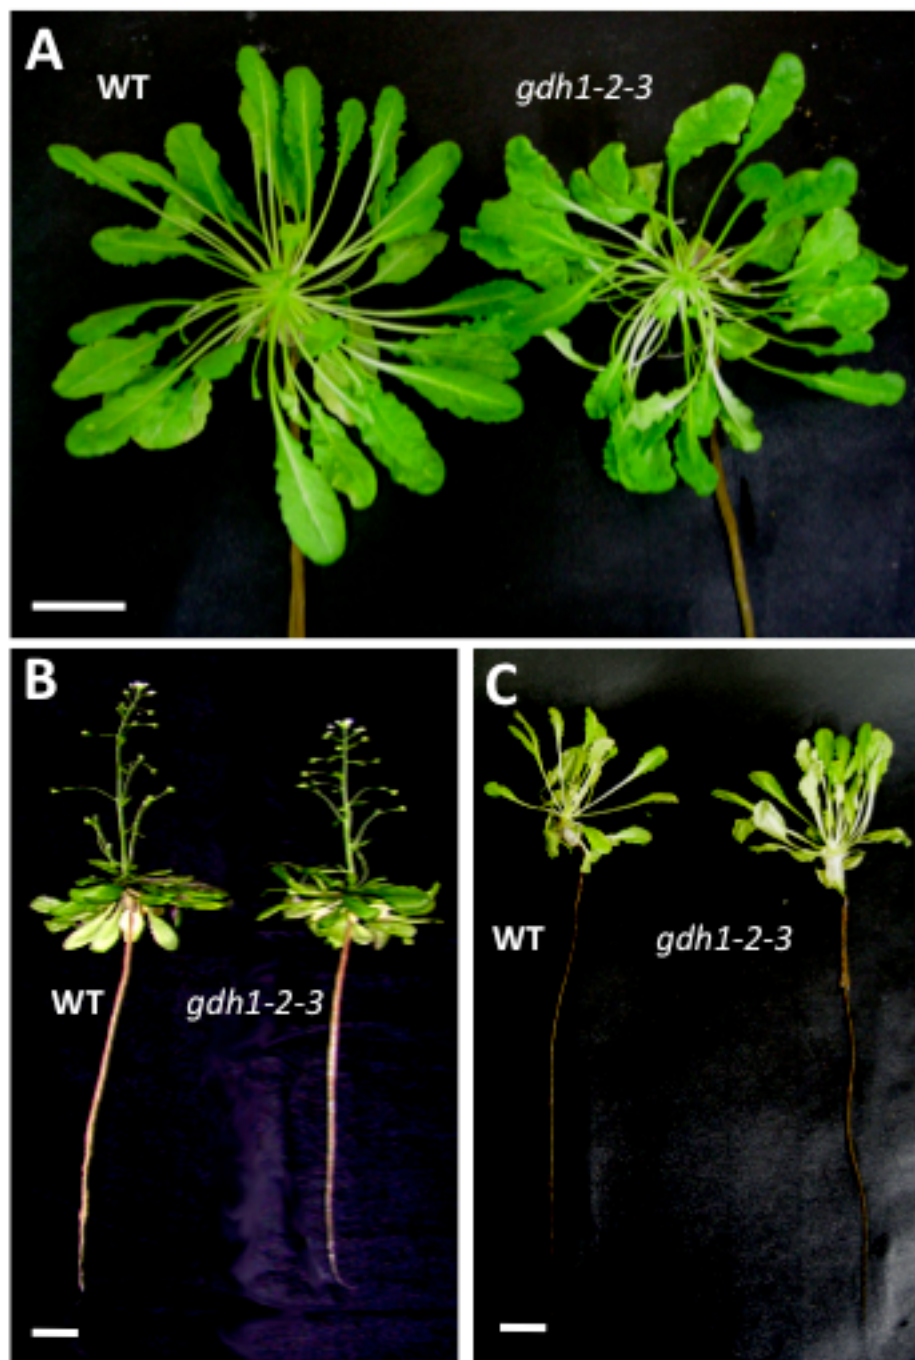

**Supplemental Figure 2:** Phenotype of the WT and of the *gdh1-2-3* Mutant  
(**A**) Phenotype of the WT and of the *gdh1-2-3* mutant at the rosette stage grown for 28 days under hydroponic conditions and corresponding to T0 in the dark-induced experiment.  
(**B**) Phenotype of the WT and of the *gdh1-2-3* mutant after floral induction.  
(**C**) Phenotype of the WT and of the *gdh1-2-3* mutant after 7 days in the dark  
Bars = 1cm

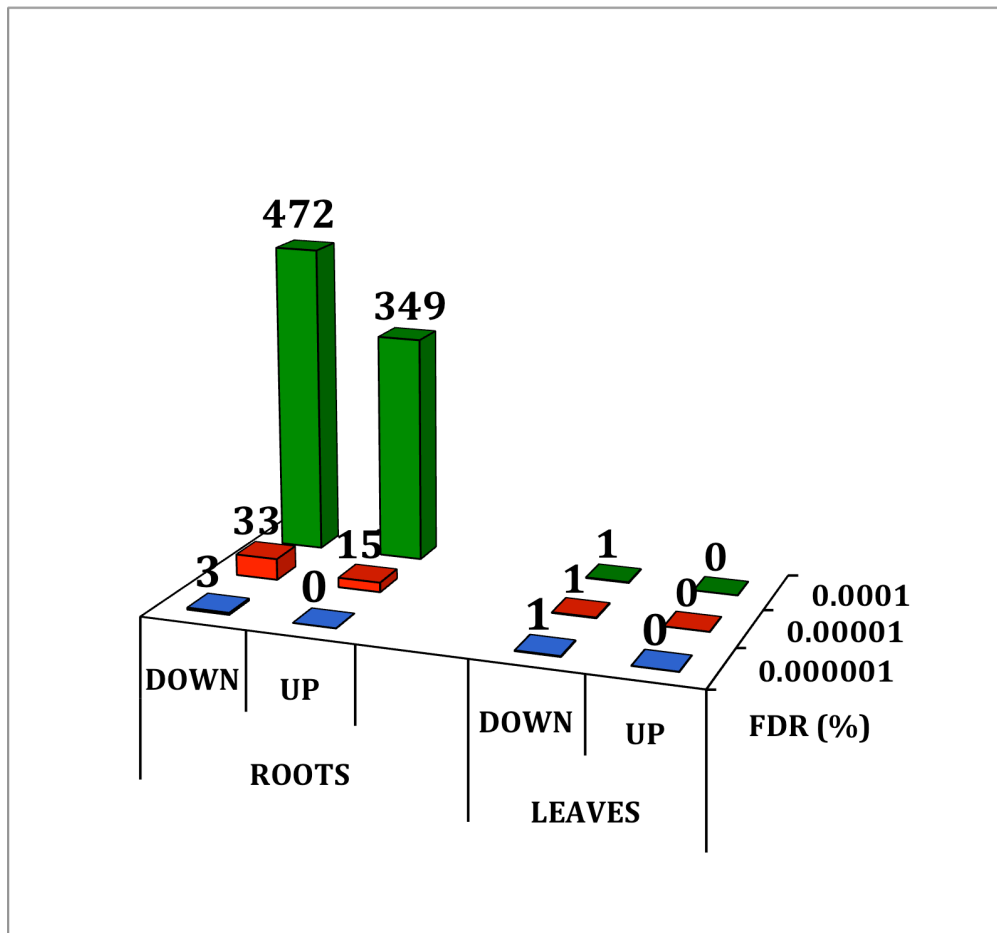

**Supplemental Figure 3.** Overall Changes in Transcript Accumulation in Roots and Leaves of *gdh1-2-3* Mutants. The rank product method was used to detect differentially expressed genes according to different levels of False Discovery Rate (FDR). Numbers on top of the columns indicate the number of differentially expressed genes.

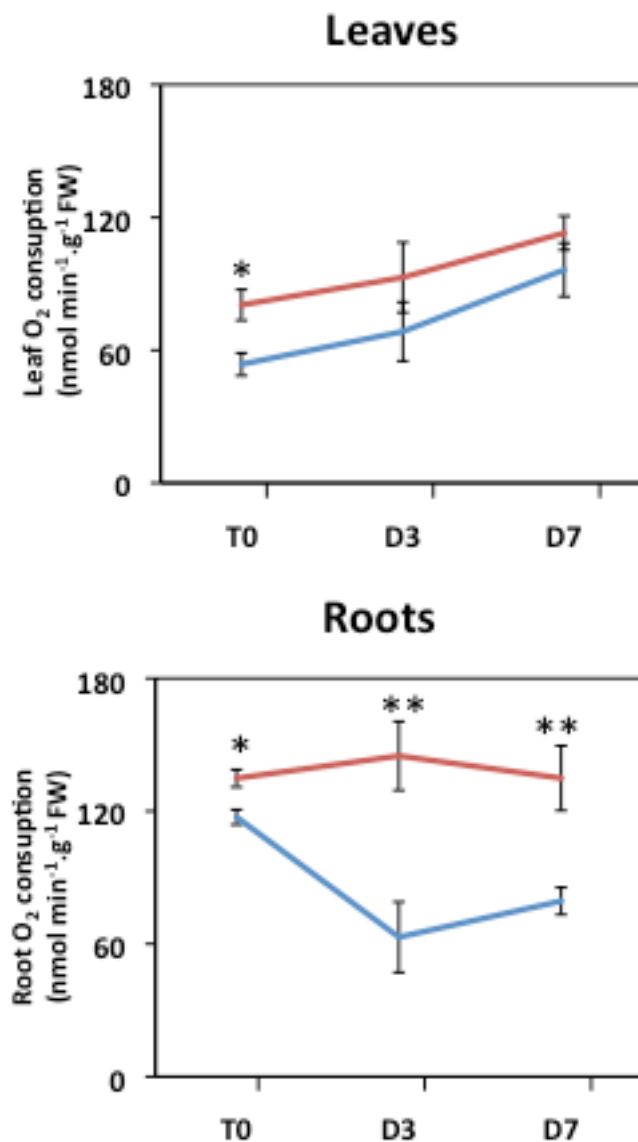

**Supplemental Figure 4.** Respiration in Leaves and Roots of the WT and *gdh1-2-3* Mutant Plants Following Prolonged Darkness. T0 = plants grown under short day conditions and harvested 2 h after the beginning of the light period, D3 = after 3 continuous days in the dark, D7 = after 7 continuous days in the dark. Respiration was measured by monitoring O<sub>2</sub> consumption of fresh roots and leaves for 30 to 45 min. The red line corresponds to the *gdh1-2-3* mutant and the blue line to the WT. Results are presented as mean values for five plants with standard errors. Asterisks indicate a bilateral t-test P-value <0.01(\*\*) and <0.05(\*) for statistically significant differences.

**Supplemental Table 1.** Quantification of GDH Protein in Different Tissue Sections of NADH-GDH Mutant Plants. Immunolocalization of the enzyme was performed using transmission electron microscopy on roots and leaves of the Wild Type (WT), and of the *gdh1-2* double mutant and *gdh1-2-3* triple mutant.

|      | Number of gold particles/ $\mu\text{m}^2 \pm \text{sd}$ in mitochondria of phloem companion cells |                         |                        |                        |
|------|---------------------------------------------------------------------------------------------------|-------------------------|------------------------|------------------------|
|      | WT                                                                                                | <i>gdh1-2</i>           | <i>gdh1-2-3</i>        | Preimmune serum        |
| Leaf | 100 $\pm$ 35                                                                                      | 10 $\pm$ 6 <sup>a</sup> | 7 $\pm$ 4 <sup>a</sup> | 6 $\pm$ 3 <sup>a</sup> |
| Root | 310 $\pm$ 40                                                                                      | 100 $\pm$ 30            | 6 $\pm$ 3 <sup>a</sup> | 6 $\pm$ 4 <sup>a</sup> |

<sup>a</sup> statistically not different

**Supplemental Table 2.** Comparison of the Results Obtained with the CATMA Microarray and a qRT-PCR Experiment for Transcripts Abundance in the *Arabidopsis gdh1-2-3* Mutant Compared to the Wild Type (WT).

| AGI <sup>d</sup> | Target transcript                                     | qRT-PCR<br>Average FC <sup>e</sup><br><i>gdh1-2-3</i> /WT | SD <sup>f</sup> | Microarray<br>FC <sup>e</sup><br><i>gdh1-2-3</i> /WT |
|------------------|-------------------------------------------------------|-----------------------------------------------------------|-----------------|------------------------------------------------------|
| AT3G0247C        | S-ADENOSYLMETHIONINE DECARBOXYLASE <sup>a</sup>       | 3.14                                                      | 0.90            | 2.34                                                 |
| AT1G2084C        | TONOPLAST MONOSACCHARIDE TRANSPORTER1                 | 1.76                                                      | 0.51            | 1.93                                                 |
| AT1G6596C        | GLUTAMATE DECARBOXYLASE 2                             | 1.78                                                      | 0.29            | 1.76                                                 |
| AT3G4845C        | <sup>b</sup> nitrate-responsive NOI protein, putative | 0.68                                                      | 0.16            | 0.29                                                 |
| AT1G7206C        | Serine-type endopeptidase inhibitor                   | 0.75                                                      | 0.12            | 0.30                                                 |
| AT4G3173C        | GLUTAMINE DUMPER 1                                    | 0.73                                                      | 0.05            | 0.59                                                 |
| AT5G0829C        | YLS8 <sup>c</sup>                                     | 1.16                                                      | 0.07            | 1.00                                                 |
| AT4G1342C        | K TRANSPORTER                                         | 1.14                                                      | 0.07            | 1.00                                                 |
| AT1G6180C        | Gluc6PT = GPT2                                        | 1.19                                                      | 0.22            | 1.00                                                 |

<sup>a,b,c</sup> Three transcripts exhibiting an increase<sup>a</sup>, a decrease<sup>b</sup> or no changes<sup>c</sup> in the *gdh1-2-3* mutant in comparison to the WT were selected from those listed in Supplementary Dataset 3 and 4.

<sup>d</sup> Arabidopsis gene identification

<sup>e</sup> Average fold change (FC) between the two replicated experiments

<sup>f</sup> Standard deviation (SD)

**Supplemental Table 3:** Oligonucleotides Used for Screening *Arabidopsis GDH* Mutant Plants. *GDH1*, *GDH2* and *GDH3* indicate the three primers pairs used in the tested gene. "+ ins" indicates the primer pair used to test the presence of the T-DNA in the tested gene with primers located at the intersection between the insertion of the T-DNA and the gene encoding GDH.

| Gene              | Primer  | Primer sequence           | Fragment size (bp) |
|-------------------|---------|---------------------------|--------------------|
| <i>GDH1</i>       | Forward | TTCTGATCAAACTCCAGTGAAA    | 1559               |
|                   | Reverse | TGATGACACCACCAAGTGCT      |                    |
| <i>GDH1</i> + ins | Forward | CGGCTACTGGAAGAGGAGTG      | 1381               |
|                   | Reverse | TCGCAAGACCCTTCCTCTA       |                    |
| <i>GDH2</i>       | Forward | ACAAGGACGCAACTGGAAGT      | 736                |
|                   | Reverse | TCCATTTGGAAGCTCAAT        |                    |
| <i>GDH2</i> + ins | Forward | ACAAGGACGCAACTGGAAGT      | 1227               |
|                   | Reverse | TCGCAAGACCCTTCCTCTA       |                    |
| <i>GDH3</i>       | Forward | GACTCTCTGATCAAATAAACCCAAA | 2103               |
|                   | Reverse | AAGGTTAACTGCAATTAGCACA    |                    |
| <i>GDH3</i> + ins | Forward | GACTCTCTGATCAAATAAACCCAAA | 1256               |
|                   | Reverse | TCGCAAGACCCTTCCTCTA       |                    |

**Supplemental Table 4:** Oligonucleotides Used for Amplification of RNA to Obtain DNA Fragments Specific for the Three Genes Encoding NADH-GDH and for the  $\beta$ -actin Genes Used as Controls.

| Gene             | Primer  | Primer sequence             | Fragment size (bp) |
|------------------|---------|-----------------------------|--------------------|
| <i>GDH1</i>      | Forward | TGGCTCAAGCTACCATTCTCAGA     | 141                |
|                  | Reverse | TCGCTCAAGCTACCACTATCAG      |                    |
| <i>GDH2</i>      | Forward | GTGGTTGGGAAGCTTAATTCAGTT    | 122                |
|                  | Reverse | TCGCTCAAGCTACCACTATCAG      |                    |
| <i>GDH3</i>      | Forward | TCGCTCAAGCTACCACTATCAG      | 151                |
|                  | Reverse | CTGCAATTAGCACATAGTTTTTACTC  |                    |
| $\beta$ -actin-2 | Forward | AGTGGTCGTACAACCGGTATTGT     | 93                 |
|                  | Reverse | GATGGCATGGAGGAAGAGAGAAAC    |                    |
| $\beta$ -actin-7 | Forward | AGTGGTCGTACAACCGGTATTGT     | 95                 |
|                  | Reverse | GAGGAAGAGCATTCCCCTCGTA      |                    |
| $\beta$ -actin-8 | Forward | AGTGGTCGTACAACCGGTATTGT     | 96                 |
|                  | Reverse | GAGGATAGCATGTGGAAGTACTGAGAA |                    |



**Supplemental Table 5:** Oligonucleotides Used for Amplification of RNA to Obtain DNA Fragments for the qRT-PCR Used to Validate the Microarray Experiment.

| Gene           | Primer  | Primer sequence              |
|----------------|---------|------------------------------|
| <i>PP2A3</i>   | Forward | GCAATCTCTCATTCCGATAGTC       |
|                | Reverse | ATACCGAACATCAACATCTGG        |
| <i>Q-TIP41</i> | Forward | GCTCATCGGTACGCTCTTTT         |
|                | Reverse | TCCATCAGTCAGAGGCTTCC         |
| <i>UBI-10</i>  | Forward | GGCCTTGATAATCCCTGATGAATAAG   |
|                | Reverse | AAAGAGATAACAGGAACGGAAACATAGT |
| <i>SAMDC</i>   | Forward | GCAATCGGTTTCGAAGGTTA         |
|                | Reverse | TCCTTTAGCTCCACCTCGAA         |
| <i>TMT</i>     | Forward | ACCCCTATTTCAACGCCTCT         |
|                | Reverse | GAGAGTCGCTCCCTTCATTG         |
| <i>GAD2</i>    | Forward | GAGAGTCGCTCCCTTCATTG         |
|                | Reverse | TCCTTTAGCTCCACCTCGAA         |
| <i>YLS8</i>    | Forward | ACTGGGATGAGACCTGTATG         |
|                | Reverse | TGTTGTTGTTACCAGTTCCA         |
| <i>HAK5</i>    | Forward | TGTTTTCGGACATTTTCGTG         |
|                | Reverse | ACCGGCTTTCGAAGTCATAC         |
| <i>G6T</i>     | Forward | GACTTTCCTCTTCCTGTCT          |
|                | Reverse | AATGGAGTGAGGATCACAAG         |
| <i>NOI</i>     | Forward | CAATAAAGCTCGCGATGACA         |
|                | Reverse | TCTTTGATCTTGGGGTTTGG         |
| <i>ENDOP</i>   | Forward | AAGCTTCCTCCAAGATGCAA         |
|                | Reverse | GAAATCGATGAGTGGGAGGA         |
| <i>GDU1</i>    | Forward | AATCGCCTTTGCTCTTCTCA         |
|                | Reverse | CAAATCTTCTCCGGCCATTA         |
